# Supplementary material
Source: Research Square preprint supplement (doi:10.21203/rs.3.rs-9427155/v1)
Supplement: Supplementary file 1 [file 44d31a487d68d4436bee77c1.docx]

**Table S1** Proportions of DM-RF deaths among all deaths occurring in Pudong New Area of Shanghai, China, 2005–2023

**Table S2** Number, CMR, and ASMRW of DM-RF deaths by sex, Pudong New Area of Shanghai, China, 2005–2023

**Table S3** DM-RF specific mortality and proportions in total deaths by age, Pudong New Area of Shanghai, China, 2005–2023

**Table S4** YLLs, AYLL and YLL rates of DM-RF deaths by sex and age group in Pudong New Area of Shanghai, China, 2005–2023

**Table S5** Trends in CMR, ASMRW, and YLL of DM-RF Deaths in Pudong New Area of Shanghai, 2005–2023

**Table S6** Drivers of Changes in DM-RF mortality in Pudong New Area of Shanghai, 2005–2023
