# Supplementary material
Source: Research Square preprint supplement (doi:10.21203/rs.3.rs-9427155/v1)
Supplement: Supplementary file 2 [file 503de4ebc89819331f029b76.docx]

**Supplementary materials**

**Table S1** Proportions of DM-RF deaths among all deaths occurring in Pudong New Area of Shanghai, China, 2005–2023

| Year | All deaths (a) | Deaths associated with diabetes (b) | Deaths associated with renal failure (c) | Diabetes-specific deaths (d) | Diabetes-specific deaths associated with renal failure (f) | Proportion  (f/a,%) | Proportion  (f/d,%) | Proportion  (d/a,%) | Proportion  (f/c,%) |
| --- | --- | --- | --- | --- | --- | --- | --- | --- | --- |
| 2005 | 18306 | 1484 | 606 | 638 | 72 | 0.39 | 11.29 | 3.49 | 11.88 |
| 2006 | 17389 | 1589 | 668 | 660 | 92 | 0.53 | 13.94 | 3.80 | 13.77 |
| 2007 | 18336 | 1908 | 766 | 690 | 102 | 0.56 | 14.78 | 3.76 | 13.32 |
| 2008 | 19061 | 1980 | 873 | 676 | 118 | 0.62 | 17.46 | 3.55 | 13.52 |
| 2009 | 19240 | 2305 | 869 | 740 | 125 | 0.65 | 16.89 | 3.85 | 14.38 |
| 2010 | 19425 | 2362 | 924 | 748 | 140 | 0.72 | 18.72 | 3.85 | 15.15 |
| 2011 | 20248 | 2600 | 1150 | 821 | 150 | 0.74 | 18.27 | 4.05 | 13.04 |
| 2012 | 21257 | 2877 | 1172 | 886 | 150 | 0.71 | 16.93 | 4.17 | 12.80 |
| 2013 | 21222 | 3017 | 1154 | 931 | 151 | 0.71 | 16.22 | 4.39 | 13.08 |
| 2014 | 21603 | 3203 | 1409 | 992 | 159 | 0.74 | 16.03 | 4.59 | 11.28 |
| 2015 | 23003 | 3524 | 1476 | 1136 | 178 | 0.77 | 15.67 | 4.94 | 12.06 |
| 2016 | 22655 | 3685 | 1528 | 1182 | 203 | 0.90 | 17.17 | 5.22 | 13.29 |
| 2017 | 23083 | 4181 | 1785 | 1301 | 231 | 1.00 | 17.76 | 5.64 | 12.94 |
| 2018 | 23465 | 4403 | 1895 | 1276 | 216 | 0.92 | 16.93 | 5.44 | 11.40 |
| 2019 | 24312 | 5043 | 1931 | 1436 | 231 | 0.95 | 16.09 | 5.91 | 11.96 |
| 2020 | 24586 | 5318 | 2029 | 1420 | 272 | 1.11 | 19.15 | 5.78 | 13.41 |
| 2021 | 25696 | 5622 | 1977 | 1556 | 282 | 1.10 | 18.12 | 6.06 | 14.26 |
| 2022 | 30633 | 6781 | 2321 | 2291 | 379 | 1.24 | 16.54 | 7.48 | 16.33 |
| 2023 | 33230 | 8073 | 2752 | 3236 | 448 | 1.35 | 13.84 | 9.74 | 16.28 |
| Total | 426750 | 69955 | 27285 | 22616 | 3699 | 0.87 | 16.36 | 5.30 | 13.56 |

Note: DM-RF, diabetes mellitus combined with renal failure

**Table S2** Number, CMR, and ASMRW of DM-RF deaths by sex, Pudong New Area of Shanghai, China, 2005–2023

| Year | Male | | |  | Female | | |  | Total | | |
| --- | --- | --- | --- | --- | --- | --- | --- | --- | --- | --- | --- |
| Deaths  (n) | CMR  (/100,000) | ASMRW  (/100,000) |  | Deaths  (n) | CMR  (/100,000) | ASMRW  (/100,000) |  | Deaths  (n) | CMR  (1/100,000) | ASMRW  (1/100,000) |
| 2005 | 28 | 2.20 | 1.17 |  | 44 | 3.47 | 1.42 |  | 72 | 2.83 | 1.29 |
| 2006 | 41 | 3.16 | 1.85 |  | 51 | 3.96 | 1.58 |  | 92 | 3.56 | 1.72 |
| 2007 | 44 | 3.35 | 1.67 |  | 58 | 4.43 | 1.76 |  | 102 | 3.89 | 1.71 |
| 2008 | 56 | 4.20 | 2.08 |  | 62 | 4.65 | 1.87 |  | 118 | 4.43 | 1.94 |
| 2009 | 53 | 3.92 | 1.94 |  | 72 | 5.32 | 2.08 |  | 125 | 4.62 | 2.01 |
| 2010 | 63 | 4.61 | 2.09 |  | 77 | 5.61 | 2.23 |  | 140 | 5.11 | 2.15 |
| 2011 | 68 | 4.92 | 2.11 |  | 82 | 5.90 | 2.28 |  | 150 | 5.41 | 2.16 |
| 2012 | 68 | 4.87 | 2.23 |  | 82 | 5.84 | 1.89 |  | 150 | 5.36 | 2.06 |
| 2013 | 74 | 5.25 | 2.37 |  | 77 | 5.44 | 1.99 |  | 151 | 5.35 | 2.17 |
| 2014 | 81 | 5.68 | 2.57 |  | 78 | 5.44 | 1.84 |  | 159 | 5.56 | 2.21 |
| 2015 | 89 | 6.15 | 2.54 |  | 89 | 6.12 | 1.91 |  | 178 | 6.13 | 2.22 |
| 2016 | 88 | 6.01 | 2.21 |  | 115 | 7.81 | 2.40 |  | 203 | 6.91 | 2.32 |
| 2017 | 122 | 8.23 | 3.15 |  | 109 | 7.31 | 2.07 |  | 231 | 7.76 | 2.60 |
| 2018 | 121 | 8.06 | 2.96 |  | 95 | 6.28 | 1.82 |  | 216 | 7.17 | 2.38 |
| 2019 | 135 | 8.87 | 3.42 |  | 96 | 6.25 | 1.73 |  | 231 | 7.55 | 2.56 |
| 2020 | 156 | 10.11 | 3.62 |  | 116 | 7.44 | 1.97 |  | 272 | 8.76 | 2.77 |
| 2021 | 154 | 9.77 | 3.37 |  | 128 | 8.03 | 2.06 |  | 282 | 8.90 | 2.70 |
| 2022 | 221 | 13.72 | 5.45 |  | 158 | 9.69 | 2.71 |  | 379 | 11.69 | 4.07 |
| 2023 | 260 | 15.85 | 5.44 |  | 188 | 11.30 | 2.94 |  | 448 | 13.56 | 4.15 |
| Total | 1922 | 7.03 | 2.93 |  | 1777 | 6.47 | 2.05 |  | 3699 | 6.75 | 2.48 |

Note: DM-RF, diabetes mellitus combined with renal failure; CMR, crude mortality rate; ASMRW, age-standardized mortality rate by Segi’s world standard population.

**Table S3** DM-RF specific mortality and proportions in total deaths by age, Pudong New Area of Shanghai, China, 2005–2023

| Year | DM-RF mortality by age (years)(1/100,000) | | | |  | Percentage of DM-RF mortality in total deaths (%) | | | |
| --- | --- | --- | --- | --- | --- | --- | --- | --- | --- |
| 45-59 | 60-69 | 70-79 | ≥80 |  | 45-59 | 60-69 | 70-79 | ≥80 |
| 2005 | 0.82 | 4.76 | 19.18 | 26.48 |  | 8.33 | 13.89 | 48.61 | 27.78 |
| 2006 | 1.88 | 6.47 | 18.43 | 35.31 |  | 15.22 | 15.22 | 36.96 | 29.35 |
| 2007 | 1.85 | 5.59 | 26.77 | 30.50 |  | 13.73 | 12.75 | 49.02 | 24.51 |
| 2008 | 2.82 | 6.66 | 20.57 | 42.07 |  | 18.64 | 14.41 | 33.05 | 32.20 |
| 2009 | 2.14 | 9.67 | 18.93 | 46.78 |  | 13.60 | 21.60 | 28.80 | 36.00 |
| 2010 | 2.01 | 10.16 | 21.53 | 50.10 |  | 11.43 | 22.14 | 29.29 | 36.43 |
| 2011 | 2.27 | 7.54 | 34.55 | 35.37 |  | 12.00 | 16.67 | 44.00 | 25.33 |
| 2012 | 2.32 | 6.34 | 21.59 | 57.79 |  | 12.00 | 15.33 | 27.33 | 44.00 |
| 2013 | 1.97 | 8.06 | 28.79 | 38.48 |  | 9.93 | 21.19 | 35.76 | 31.13 |
| 2014 | 2.02 | 7.81 | 23.80 | 45.03 |  | 9.43 | 21.38 | 28.30 | 37.11 |
| 2015 | 2.08 | 8.06 | 26.37 | 51.36 |  | 8.43 | 21.35 | 28.65 | 39.89 |
| 2016 | 2.98 | 6.81 | 27.18 | 63.88 |  | 10.34 | 16.75 | 27.09 | 44.83 |
| 2017 | 3.52 | 8.93 | 23.84 | 72.67 |  | 10.39 | 20.35 | 22.51 | 45.89 |
| 2018 | 2.43 | 10.93 | 25.78 | 50.98 |  | 7.41 | 27.78 | 28.24 | 35.19 |
| 2019 | 3.89 | 7.66 | 27.41 | 57.90 |  | 10.82 | 18.61 | 30.74 | 38.10 |
| 2020 | 3.65 | 10.53 | 24.64 | 74.02 |  | 8.46 | 22.06 | 25.74 | 41.91 |
| 2021 | 2.70 | 10.67 | 25.40 | 77.05 |  | 6.03 | 21.63 | 28.01 | 42.91 |
| 2022 | 8.01 | 14.68 | 33.25 | 75.71 |  | 13.46 | 21.90 | 30.08 | 31.66 |
| 2023 | 4.41 | 13.98 | 39.90 | 115.51 |  | 6.25 | 17.63 | 33.48 | 40.40 |
| Total | 2.75 | 9.25 | 26.57 | 58.87 |  |  |  |  |  |

Note: DM-RF, diabetes mellitus combined with renal failure.

**Table S4** YLLs, AYLL and YLL rates of DM-RF deaths by sex and age group in Pudong New Area of Shanghai, China, 2005–2023

|  | YLL (years) | | |  | AYLL (years/person) | | |  | YLL rate (1/100,000) | | |  | YLL rate (/100,000) by age (years) | | | |
| --- | --- | --- | --- | --- | --- | --- | --- | --- | --- | --- | --- | --- | --- | --- | --- | --- |
| Year | Male | Female | Total |  | Male | Female | Total |  | Male | Female | Total |  | 45-59 | 60-69 | 70-79 | ≥80 |
| 2005 | 269.50 | 462.94 | 732.44 |  | 9.62 | 10.52 | 10.17 |  | 21.15 | 36.52 | 28.82 |  | 15.51 | 64.95 | 187.29 | 151.76 |
| 2006 | 498.47 | 506.45 | 1004.91 |  | 12.16 | 9.93 | 10.92 |  | 38.47 | 39.28 | 38.88 |  | 35.98 | 90.21 | 175.47 | 185.64 |
| 2007 | 443.21 | 617.76 | 1060.98 |  | 10.07 | 10.65 | 10.40 |  | 33.72 | 47.17 | 40.43 |  | 36.18 | 82.59 | 247.24 | 162.00 |
| 2008 | 597.65 | 698.54 | 1296.19 |  | 10.67 | 11.27 | 10.98 |  | 44.82 | 52.43 | 48.62 |  | 54.28 | 98.16 | 194.06 | 229.97 |
| 2009 | 577.35 | 744.24 | 1321.58 |  | 10.89 | 10.34 | 10.57 |  | 42.73 | 55.00 | 48.87 |  | 40.97 | 142.47 | 185.32 | 255.66 |
| 2010 | 601.94 | 823.50 | 1425.44 |  | 9.55 | 10.69 | 10.18 |  | 44.00 | 60.00 | 52.02 |  | 38.50 | 141.66 | 199.97 | 264.63 |
| 2011 | 625.73 | 981.99 | 1607.72 |  | 9.20 | 11.98 | 10.72 |  | 45.27 | 70.68 | 58.01 |  | 44.47 | 111.60 | 314.32 | 194.62 |
| 2012 | 710.86 | 765.23 | 1476.09 |  | 10.45 | 9.33 | 9.84 |  | 50.95 | 54.54 | 52.75 |  | 45.90 | 91.26 | 200.75 | 312.64 |
| 2013 | 801.52 | 763.81 | 1565.32 |  | 10.83 | 9.92 | 10.37 |  | 56.91 | 53.93 | 55.42 |  | 36.89 | 113.05 | 278.10 | 201.31 |
| 2014 | 897.59 | 727.72 | 1625.31 |  | 11.08 | 9.33 | 10.22 |  | 62.91 | 50.73 | 56.81 |  | 38.48 | 107.57 | 229.24 | 224.62 |
| 2015 | 939.76 | 806.88 | 1746.64 |  | 10.56 | 9.07 | 9.81 |  | 64.94 | 55.47 | 60.20 |  | 39.23 | 113.50 | 249.13 | 270.22 |
| 2016 | 835.88 | 1116.32 | 1952.20 |  | 9.50 | 9.71 | 9.62 |  | 57.05 | 75.79 | 66.44 |  | 55.42 | 97.44 | 260.64 | 350.65 |
| 2017 | 1221.75 | 976.61 | 2198.36 |  | 10.01 | 8.96 | 9.52 |  | 82.37 | 65.46 | 73.89 |  | 66.48 | 124.16 | 224.93 | 377.87 |
| 2018 | 1251.97 | 912.84 | 2164.82 |  | 10.35 | 9.61 | 10.02 |  | 83.38 | 60.36 | 71.83 |  | 43.56 | 152.83 | 242.85 | 263.47 |
| 2019 | 1400.95 | 879.56 | 2280.51 |  | 10.38 | 9.16 | 9.87 |  | 92.03 | 57.27 | 74.57 |  | 72.82 | 109.36 | 252.64 | 296.16 |
| 2020 | 1560.52 | 1055.81 | 2616.33 |  | 10.00 | 9.10 | 9.62 |  | 102.51 | 68.74 | 85.55 |  | 66.11 | 148.69 | 256.90 | 377.27 |
| 2021 | 1495.77 | 1087.50 | 2583.27 |  | 9.71 | 8.50 | 9.16 |  | 94.93 | 68.26 | 81.52 |  | 50.35 | 149.25 | 232.47 | 380.38 |
| 2022 | 2506.58 | 1531.25 | 4037.83 |  | 11.34 | 9.69 | 10.65 |  | 155.61 | 93.95 | 124.60 |  | 148.23 | 206.00 | 311.59 | 382.52 |
| 2023 | 2496.91 | 1681.13 | 4178.04 |  | 9.60 | 8.94 | 9.33 |  | 152.24 | 101.07 | 126.48 |  | 84.71 | 194.66 | 368.78 | 584.70 |
| Total | 19733.92 | 17140.06 | 36873.98 |  | 10.27 | 9.65 | 9.97 |  | 72.18 | 62.37 | 67.26 |  | 52.07 | 130.34 | 249.42 | 305.32 |

Note: YLL, years of life lost; AYLL, average years of life lost.

**Table S5** Trends in CMR, ASMRW, and YLL of DM-RF deaths by sex and age in Pudong New Area of Shanghai, 2005–2023

|  | **Estimates** | **AAPC (95%CI) (%)** | **P values** | **Z** |
| --- | --- | --- | --- | --- |
| **CMR** |  |  |  |  |
| Male | 7.03 | 11.48 (7.81, 15.27) | <0.001 | 6.37 |
| Female | 6.47 | 6.67 (3.53, 9.90) | <0.001 | 4.23 |
| 45-59 | 2.75 | 6.62 (3.88, 9.43) | <0.001 | 5.20 |
| 60-69 | 9.25 | 6.15 (1.20, 11.33) | 0.014 | 2.45 |
| 70-79 | 26.57 | 2.46 (1.02, 3.93) | 0.002 | 3.62 |
| 80+ | 58.87 | 5.96 (4.33, 7.63) | <0.001 | 7.85 |
| Total | 6.75 | 9.14 (6.48, 11.87) | <0.001 | 6.94 |
| **ASMRW** |  |  |  |  |
| Male | 2.93 | 7.85 (3.99, 11.85) | <0.001 | 4.06 |
| Female | 2.05 | 4.23 (1.19, 7.36) | 0.006 | 2.74 |
| Total | 2.48 | 6.89 (4.97, 8.85) | <0.001 | 7.20 |
| **YLL rate** |  |  |  |  |
| Male | 72.18 | 9.11 (7.74, 10.50) | <0.001 | 14.52 |
| Female | 62.37 | 5.97 (1.87, 10.23) | 0.004 | 2.88 |
| 45-59 | 52.07 | 6.35 (3.56, 9.22) | <0.001 | 4.89 |
| 60-69 | 130.34 | 6.22 (1.61, 11.04) | 0.008 | 2.67 |
| 70-79 | 249.42 | 2.43 (1.09, 3.79) | 0.001 | 3.84 |
| 80+ | 305.32 | 5.42 (3.75, 7.13) | <0.001 | 6.95 |
| Total | 67.26 | 8.64 (5.99, 11.36) | <0.001 | 6.58 |
| **AYLL** |  |  |  |  |
| Male | 10.27 | -0.19 (-0.83, 0.44) | 0.530 | -0.64 |
| Female | 9.65 | -1.12 (-1.67, -0.57) | 0.001 | -4.26 |
| Total | 9.97 | -0.62 (-0.97, -0.26) | 0.002 | -3.65 |
| **Proportion** |  |  |  |  |
| 45-59 | NA | -3.08 (-5.15, -0.97) | 0.007 | -3.06 |
| 60-69 | NA | 2.17 (0.66, 3.71) | 0.008 | 3.03 |
| 70-79 | NA | -1.66 (-4.50, 1.27) | 0.264 | -1.12 |
| 80+ | NA | 2.07 (0.67, 3.49) | 0.006 | 3.13 |

Note: DM-RF, diabetes mellitus combined with renal failure; CMR, crude mortality rate (per 100,000); ASMRW, age-standardized mortality rate by Segi’s world standard population (per 100,000); YLL, years of life lost; AAPC, average annual percentage change; CI, confidence interval.

**Table S6** Drivers of Changes in DM-RF mortality in Pudong New Area of Shanghai, 2005–2023

|  | Excess death (%) | Excess DM-RF death (%) attributable to | | |
| --- | --- | --- | --- | --- |
|  | Population aging | Population growth | Epidemiological change |
| Overall | 376 (522.22) | 92.47 (128.43) | 59.39 (82.49) | 224.13 (311.29) |
| Male | 232 (828.57) | 55.91 (199.68) | 30.27 (108.11) | 145.81 (520.75) |
| Female | 144 (327.27) | 37.81 (85.93) | 28.76 (65.36) | 77.43 (175.98) |

Note: DM-RF, diabetes mellitus combined with renal failure.
